# Supplementary material for: Composite membrane with ultra-thin ion exchangeable functional layer: a new separator choice for manganese-based cathode material in lithium ion batteries
Source: Royal Society of Chemistry journal article supplement (doi:10.1039/c4ta06908k), 2015-01-01
Supplement: c4ta06908k1.pdf [file c4ta06908k1.pdf]

# Composite membrane with ultra-thin ion exchangeable functional layer: a new separator choice for manganese-based cathode material in lithium ion batteries

Junli Shi<sup>a</sup>, Yonggao Xia<sup>\*a</sup>, Zhizhang Yuan<sup>b</sup>, Huasheng Hu<sup>a</sup>, Xianfeng Li<sup>\*b</sup>, Hui Jiang<sup>b</sup>,  
Huamin Zhang<sup>b</sup> and Zhaoping Liu<sup>\*a</sup>

<sup>a</sup> Ningbo Institute of Materials Technology Engineering (NIMTE), Chinese Academy of Sciences, Zhejiang, China, 31520. *E-mail: xiayg@nimte.ac.cn; liuzp@nimte.ac.cn;* <sup>b</sup> Division of energy storage, Dalian Institute of Chemical Physics, Chinese Academy of Sciences, Dalian, China, 116023. *E-mail: lixianfeng@dicp.ac.cn*

## Supporting information:

**Table S1** The atomic concentration of the Li, S, C, O, F element determined by XPS

| The element | Atomic concentration (%) |
|-------------|--------------------------|
| Li          | 2.82                     |
| S           | 2.81                     |
| C           | 39.02                    |
| O           | 8.36                     |
| F           | 46.99                    |

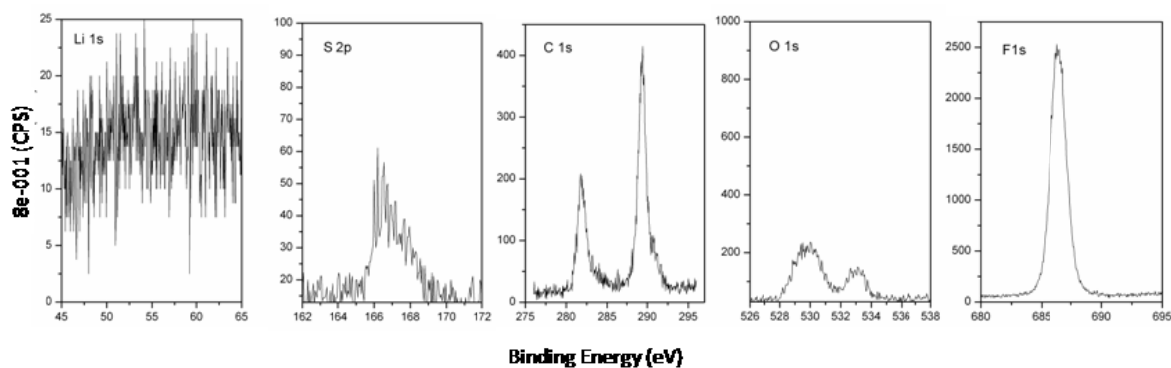

**Figure S1** The XPS spectra of the Nf-PP-Li separator.

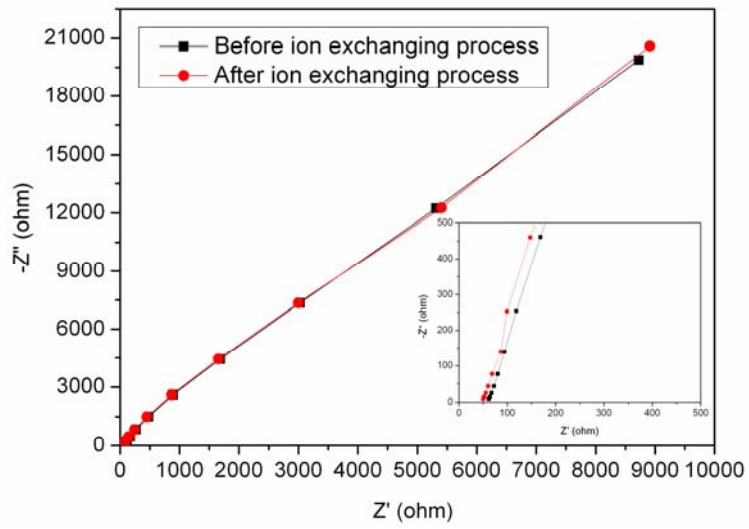

**Figure S2** The Nyquist plots of the Nf-PP-Li separator before and after the ion exchange process.

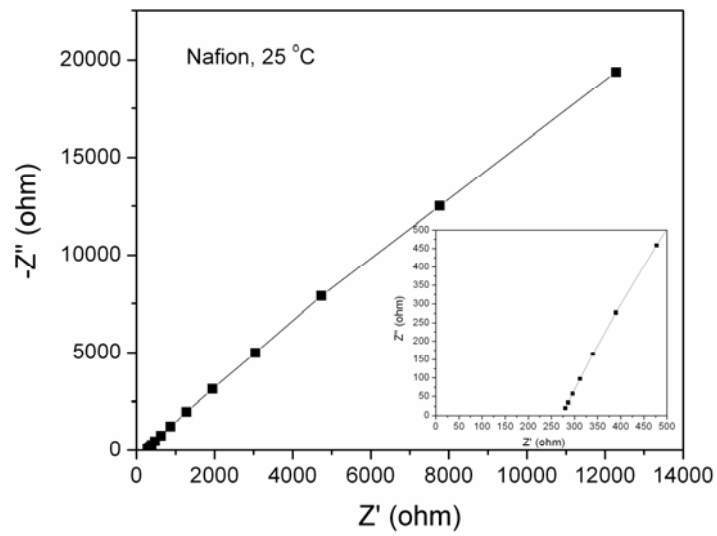

**Figure S3** The Nyquist plots of the Nafion membrane.

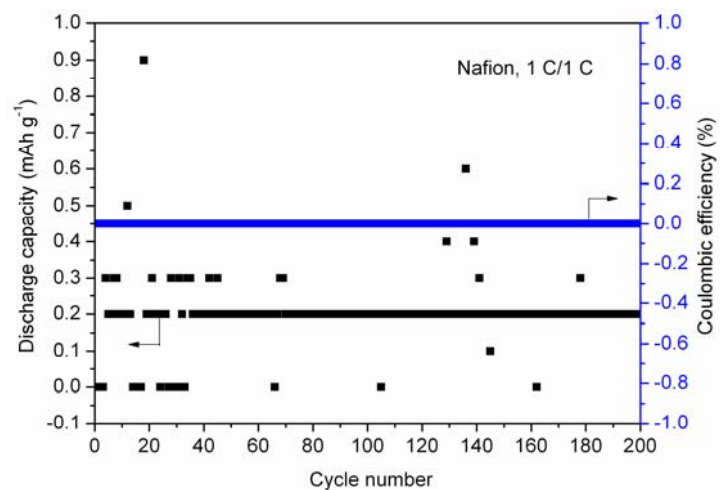

**Figure S4** The discharge capacity and coulombic efficiency of the coin cells containing the Nafion membrane at 1 C. The coin cells were in the assembly of  $\text{LiMn}_2\text{O}_4$  cathode/separator/lithium anode.
